# Supplementary material for: A biomarker of aging, p16, predicts peripheral neuropathy in women receiving adjuvant taxanes for breast cancer
Source: PubMed Central journal article supplement (PMC9458644; doi:10.1038/s41523-022-00473-3), 2022-09-08
Supplement: 41523_2022_473_MOESM1_ESM.pdf [file 41523_2022_473_MOESM1_ESM.pdf]

Supplementary Table 1. Addition of taxane administration frequency to the p16Age Gap-driven model does not change model performance.

| Variable                  | Estimate | p     |
|---------------------------|----------|-------|
| p16Age Gap                | -0.047   | 0.01  |
| <i>p16</i> pre-chemo      | 1.25     | 0.04  |
| Taxane type [paclitaxel]  | 0.88     | 0.002 |
| Taxane frequency [weekly] | -0.24    | 0.32  |
| Model Performance         |          |       |
| AICc                      | 158      |       |
| BIC                       | 172      |       |
| Chi-square                | 29.5     |       |
| p value                   | 0.0001   |       |

Supplementary Table 2. Dose reduction and discontinuation due to toxicities.

|                             | All<br>N=152 | Grade 2+ CIPN<br>n=44 | No CIPN<br>n=108 |
|-----------------------------|--------------|-----------------------|------------------|
| Dose reduction, n (%)       | 46 (30)      | 18 (41)               | 28 (26)          |
| Dose discontinuation, n (%) | 22 (14)      | 10 (23)               | 12 (11)          |

Supplementary Figure 1

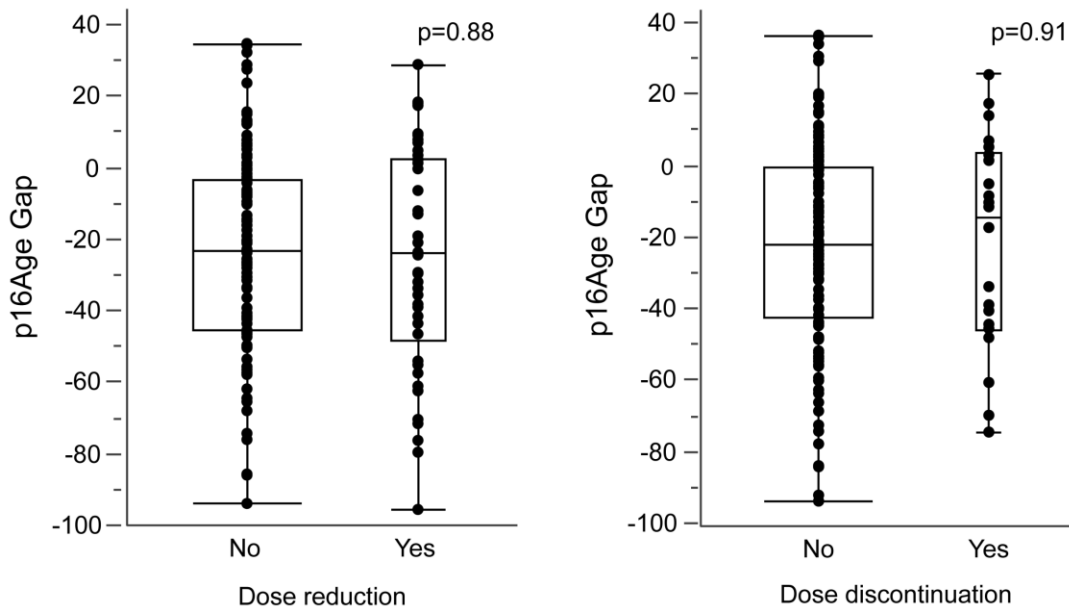

Supplementary Figure 1. P16Age Gap does not differ between participant groups whose taxane regimen was discontinued or reduced due to chemotherapy toxicity.
